# 1 Multi model evaluation of phenology prediction for wheat in Australia

2 Wallach<sup>1</sup>, Daniel; Palosuo<sup>2</sup>, Taru; Thorburn<sup>3</sup>, Peter; Hochman<sup>3</sup>, Zvi; Andrianasolo<sup>4</sup>, Fety; Asseng<sup>5</sup>,  
3 Senthold; Basso<sup>6</sup>, Bruno; Buis<sup>7</sup>, Samuel; Crout<sup>8</sup>, Neil; Dumont<sup>9</sup>, Benjamin; Ferrise<sup>10</sup>, Roberto; Gaiser<sup>11</sup>, Thomas;  
4 Gayler<sup>12</sup>, Sebastian; Hiremath<sup>13</sup>, Santosh; Hoek<sup>14</sup>, Steven; Horan<sup>3</sup>, Heidi; Hoogenboom<sup>5,15</sup>, Gerrit; Huang<sup>16</sup>,  
5 Mingxia; Jabloun<sup>8</sup>, Mohamed; Jansson<sup>17</sup>, Per-Erik; Jing<sup>18</sup>, Qi; Justes<sup>19</sup>, Eric; Kersebaum<sup>20,21</sup>, Kurt Christian;  
6 Launay<sup>22</sup>, Marie; Lewan<sup>23</sup>, Elisabet; Luo<sup>24</sup>, Qunying; Maestrini<sup>14</sup>, Bernardo; Moriondo<sup>25</sup>, Marco; Padovan<sup>10</sup>,  
7 Gloria; Olesen<sup>26</sup>, Jørgen Eivind; Poyda<sup>27</sup>, Arne; Priesack<sup>28</sup>, Eckart; Pullens<sup>26</sup>, Johannes Wilhelmus Maria; Qian<sup>18</sup>,  
8 Budong; Schütze<sup>29</sup>, Niels; Shelia<sup>5,15</sup>, Vakhtang; Souissi<sup>30,31</sup>, Amir; Specka<sup>20</sup>, Xenia; Srivastava<sup>11</sup>, Amit Kumar;  
9 Stella<sup>20</sup>, Tommaso; Streck<sup>12</sup>, Thilo; Trombi<sup>10</sup>, Giacomo; Wallor<sup>20</sup>, Evelyn; Wang<sup>16</sup>, Jing; Weber<sup>12</sup>, Tobias, K.D.;  
10 Weihermüller<sup>32</sup>, Lutz; de Wit<sup>14</sup>, Allard; Wöhling<sup>29,33</sup>, Thomas; Xiao<sup>5,34</sup>, Liujun; Zhao<sup>5</sup>, Chuang; Zhu<sup>34</sup>, Yan;  
11 Seidel, Sabine J.<sup>11</sup>

12

13

14 <sup>1</sup>INRA, UMR AGIR, Castanet Tolosan, France. ORCID 0000-0003-3500-8179

15 <sup>2</sup>Natural Resources Institute Finland (Luke), Helsinki, Finland

16 <sup>3</sup>CSIRO Agriculture and Food, Brisbane, Queensland, Australia

17 <sup>4</sup>ARVALIS - Institut du végétal Paris, France

18 <sup>5</sup>Agricultural and Biological Engineering Department, University of Florida, Gainesville, Florida

19 <sup>6</sup>Department of Earth and Environmental Sciences, Michigan State University, East Lansing, Michigan

20 <sup>7</sup>INRA, UMR 1114 EMMAH, Avignon, France

21 <sup>8</sup>School of Biosciences, University of Nottingham, Loughborough, UK

22 <sup>9</sup>Plant Sciences & TERRA Teaching and Research Centre, Gembloux Agro-Bio Tech, University of Liege,  
23 Gembloux, Belgium

24 <sup>10</sup>Department of Agriculture, Food, Environment and Forestry (DAGRI), University of Florence, Italy

25 <sup>11</sup>Institute of Crop Science and Resource Conservation, University of Bonn, Germany

26 <sup>12</sup>Institute of Soil Science and Land Evaluation, Biogeophysics, University of Hohenheim, Stuttgart, Germany

27 <sup>13</sup>Aalto University School of Science, Espoo, Finland

28 <sup>14</sup>Wageningen University & Research, Wageningen, The Netherlands

29 <sup>15</sup>Institute for Sustainable Food Systems, University of Florida, Gainesville, Florida

30 <sup>16</sup>College of Resources and Environmental Sciences, China Agricultural University, Beijing, China

31 <sup>17</sup>Royal Institute of Technology (KTH), Stockholm, Sweden

32 <sup>18</sup>Ottawa Research and Development Centre, Agriculture and Agri-Food Canada, Ottawa, Canada

33 <sup>19</sup>CIRAD, UMR SYSTEM, Montpellier, France

34 <sup>20</sup>Leibniz Centre for Agricultural Landscape Research, Müncheberg, Germany

35 <sup>21</sup>Global Change Research Institute CAS, Brno, Czech Republic

36 <sup>22</sup>INRA, US 1116 AgroClim, Avignon, France

37 <sup>23</sup>Department of Soil and Environment, Swedish University of Agricultural Sciences (SLU), Uppsala, Sweden

38 <sup>24</sup>Hillridge Technology Pty Ltd, Sydney, Australia

- 39 <sup>25</sup>CNR-IBE, Firenze, Italy
- 40 <sup>26</sup>Department of Agroecology, Aarhus University, Tjele, Denmark
- 41 <sup>27</sup>Grass and Forage Science / Organic Agriculture, Institute of Crop Science and Plant Breeding, Kiel University,  
42 Kiel, Germany
- 43 <sup>28</sup>Institute of Biochemical Plant Pathology, Helmholtz Zentrum München-German Research Center for  
44 Environmental Health, Neuherberg, Germany
- 45 <sup>29</sup>Institute of Hydrology and Meteorology, Chair of Hydrology, Technische Universität Dresden, Dresden,  
46 Germany
- 47 <sup>30</sup>National Institute of Agronomic Research of Tunisia (INRAT), Agronomy Laboratory, University of Carthage,  
48 Tunis, Tunisia
- 49 <sup>31</sup>National Agronomy Institute of Tunisia (INAT), University of Carthage, Tunis, Tunisia
- 50 <sup>32</sup>Institute of Bio- and Geosciences - IBG-3, Agrosphere, Forschungszentrum Jülich GmbH, Jülich, Germany
- 51 <sup>33</sup>Lincoln Agritech Ltd., Hamilton, New Zealand
- 52 <sup>34</sup>National Engineering and Technology Center for Information Agriculture, Jiangsu Key Laboratory for  
53 Information Agriculture, Jiangsu Collaborative Innovation Center for Modern Crop Production, Nanjing  
54 Agricultural University, Nanjing, Jiangsu, China
- 55
- 56

## 57 Abstract

58 Predicting wheat phenology is important for cultivar selection, for effective crop  
59 management and provides a baseline for evaluating the effects of global change. Evaluating  
60 how well crop phenology can be predicted is therefore of major interest. Twenty-eight wheat  
61 modeling groups participated in this evaluation. Model predictions depend not only on model  
62 structure but also on the parameter values. This study is thus an evaluation of modeling groups,  
63 which choose the structure and fix or estimate the parameters, rather than an evaluation just of  
64 model structures. Our target population was wheat fields in the major wheat growing regions  
65 of Australia under current climatic conditions and with current local management practices.  
66 The environments used for calibration and for evaluation were both sampled from this same  
67 target population. The calibration and evaluation environments had neither sites nor years in  
68 common, so this is a rigorous evaluation of the ability of modeling groups to predict phenology  
69 for new sites and weather conditions. Mean absolute error (MAE) for the evaluation  
70 environments, averaged over predictions of three phenological stages and over modeling  
71 groups, was 9 days, with a range from 6 to 20 days. Predictions using the multi-modeling group  
72 mean and median had prediction errors nearly as small as the best modeling group. For a given  
73 modeling group, MAE for the evaluation environments was significantly correlated with MAE  
74 for the calibration environments, which suggests that it would be of interest to test ensemble  
75 predictors that weight individual modeling groups based on performance for the calibration  
76 data. About two thirds of the modeling groups performed better than a simple but relevant  
77 benchmark, which predicts phenology by assuming a constant temperature sum for each  
78 development stage. The added complexity of crop models beyond just the effect of temperature  
79 was thus justified in most cases. Finally, there was substantial variability between modeling  
80 groups using the same model structure, which implies that model improvement could be

81 achieved not only by improving model structure, but also by improving parameter values, and  
82 in particular by improving calibration techniques.

83           Keywords: evaluation, phenology, wheat, Australia, structure uncertainty, parameter  
84 uncertainty

85

## 86 1. Introduction

87 Crop phenology describes the cycle of biological events during plant growth. These  
88 events include, for example, seedling emergence, leaf appearance, flowering, and maturity.  
89 Timing of growing seasons and their critical phases as well as estimates of them are increasingly  
90 important in changing climate (Olesen et al., 2012, Dalhaus et al., 2018). Matching the  
91 phenology of crop varieties to the climate in which they grow is critical for viable crop  
92 production strategies (Rezaei et al., 2018, Hunt et al., 2019). Furthermore, accurate simulation  
93 of phenology is essential for models which simulate plant growth and yield (Archontoulis et  
94 al., 2014; Boote et al., 2010, 2008).

95 In this study we focus on wheat phenology in Australia. Australia was the world's ninth  
96 largest producer of wheat in 2018 and the sixth largest exporter (Workman, 2020). Crop model  
97 predictions of phenology have been used in various studies related to wheat production in  
98 Australia. In a study by Luo et al. (2018), the APSIM model was used to simulate changes in  
99 phenology, water use efficiency, and yield to be expected from global climate change. The  
100 APSIM model was used to evaluate changes in wheat phenology in Australia as a result of  
101 warming temperatures in recent decades (Sadras and Monzon, 2006). That model was also used  
102 to determine the flowering date at each location associated with highest average yield (Flohr et  
103 al., 2017).

104 Given the interest in using crop models to predict phenology, it is important to evaluate  
105 those predictions. How well can wheat phenology be predicted? In trying to answer this  
106 question, one must first define exactly what aspect of the models is being evaluated, and then  
107 must choose an appropriate methodology for carrying out the evaluation.

108 It is important to distinguish two different types of model evaluation, which might be  
109 termed evaluation of extrapolation predictions and evaluation of interpolation predictions. They

110 differ as to whether or not the data provided for calibration are representative of the target  
111 population, i.e. of the range of environments of interest. In one type of study, the objective is  
112 to evaluate how well models can extrapolate to conditions not represented in the calibration  
113 data. For example, in a multi-model ensemble study on the effect of high temperatures on wheat  
114 growth (Asseng et al., 2015), detailed crop measurements were provided for one planting date  
115 and the models were evaluated using other planting dates, some with additional artificial heating  
116 during growth. The evaluation data thus represented a much larger range of temperatures than  
117 represented in the calibration data. This was a test of how well the models can extrapolate to  
118 more extreme temperatures than those available for calibration. Other studies have evaluated  
119 how well crop models can extrapolate to environments with enhanced CO<sub>2</sub>, given calibration  
120 data for current ambient CO<sub>2</sub> levels (Biernath et al., 2011).

121 In the second type of study, the calibration data are meant to be representative of the  
122 target population. This evaluates how well crop models can generalize from the calibration  
123 environments to other similar environments. An example is the study by Ceglar et al. (2019),  
124 which used data on wheat phenology under current conditions in Europe for calibration and  
125 then predicted phenology for other environments from the same target population. This type of  
126 evaluation is adapted, for example, to the case where one has data from a network of variety  
127 trials and wants to predict for other sites and years from the same target population, as in Bao  
128 et al.. (2017) for yield. It is this aspect of crop phenology models, namely their ability to predict  
129 when provided with a sample of data from the target population, that is evaluated in the present  
130 study.

131 A second aspect of evaluation that must be specified is the modeling group or groups  
132 that are being evaluated. We reserve the term “model” specifically for model structure, i.e. the  
133 model equations, while modeling group determines both the model structure and the parameter  
134 values, which are chosen or estimated by the group running the model. It is clear that predictions

135 depend not only on the model structure but also on the parameter values, so evaluation really  
136 refers to the modeling group. Model evaluation studies may refer to a particular modeling group  
137 or to an ensemble of modeling groups. Here, we evaluate an ensemble of 28 different modeling  
138 groups. The purpose is not to give information about each specific modeling group, but rather  
139 to evaluate how well currently active modeling groups can predict phenology for our target  
140 population (e.g. what is the error of the best predicting group), how well can one expect a  
141 modeling group chosen at random to predict (e.g. what is the mean or median prediction error),  
142 and what is the variability between modeling groups (e.g. what is the spread between the best  
143 and worst predictors).

144         It is important to define precisely the evaluation problem (extrapolation or interpolation,  
145 single- or multi-group evaluation), but it is also important that the methodology of evaluation  
146 be such as to give reliable results. We focus here on the relation of the predictor (model plus  
147 parameter values) and evaluation data. It is well-known from statistics that if a predictor is not  
148 independent of the evaluation data, then the error for the evaluation data will in general be less  
149 than for new environments (Efron, 1986). That is, non-independence in general leads to  
150 underestimating prediction errors. The predictor could depend on the evaluation data if, for  
151 example, the evaluation data were also used to calibrate the model, or were used to modify the  
152 model equations, or were used to tune site characteristics. If the same sites are present in the  
153 calibration and evaluation data, then the model has to some extent been tuned to those sites, and  
154 so the predictor is not independent of the evaluation data even if the evaluation data have not  
155 been used directly to fit the model. Having the same sites in the calibration and evaluation data  
156 is often the case for evaluation studies (Andarzian et al., 2015; Asseng et al., 2008; Chauhan et  
157 al., 2019; Hussain et al., 2018; Yuan et al., 2017).

158         There do not seem to have been any multi-modeling group evaluation studies of  
159 prediction of wheat phenology in Australia, where the calibration data are sampled from the

160 target population (i.e. evaluation of interpolation predictions). The purpose of this study is to  
161 present such an evaluation, using a rigorous approach where the parameterized model is  
162 independent of the evaluation data.

## 163 2. Materials and Methods

### 164 2.1 Experimental data

165 The data are a subset from a multi-cultivar, multi-location, and multi-sowing date trial  
166 for wheat in Australia, described in(Lawes et al. (2016). The environments reflect the diversity  
167 in the wheat-growing regions of Australia (Fig. 1). Only the data for cultivar Janz, classified as  
168 a fast-moderate maturing cultivar, were used here. The data are from 10 sites, located  
169 throughout the grain growing region each with one to three sowing years and three planting  
170 dates in each year (overall 66 environments, i.e. site-sowing date combinations, Table 1). The  
171 sowing dates at each site correspond to early, conventional, and late sowing. Plant density was  
172 100-120 plants/m<sup>2</sup>, and sowing depth was 20-35 mm. Nutrients were managed to be non-  
173 limiting. There were 1-3 repetitions for each environment (average of 2.1 repetitions).

174



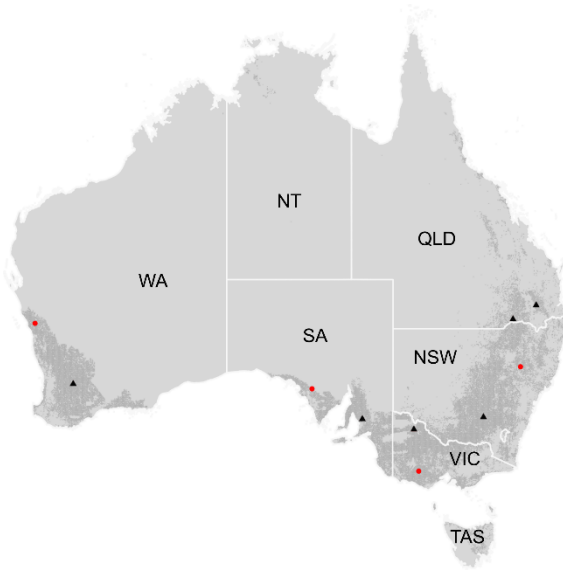

175

176

**Figure 1**

177

178

**Location of calibration (red circles) and evaluation (blue triangles) sites across the Australian cropping zones (shaded area; Source: Teluguntla et al., 2018).**

179

180

181

182

183

184

185

186

Plots were visited regularly (about every two weeks) starting soon after emergence of the early sowing and ending after crop maturity, and the Zadoks growth stage (Zadoks et al., 1974), on a scale from 1-100, was determined. Overall, there were 709 combinations of environment and measurement date, with an average of 10.7 stage notations per environment. The stages to be predicted here are stage Z30 (Zadoks stage 30, pseudostem, i.e. youngest leaf sheath erection), stage Z65 (Zadoks stage 65, anthesis half-way, i.e. anthers occurring half way to tip and base of ear), and stage Z90 (Zadoks stage 90, grain hard, difficult to divide). These stages are often used for management decisions or to characterize phenology.

187

188

189

190

191

In preparing the data for the simulation study, a linear interpolation was performed between each pair of stages, to give the date for every integer Zadoks stage from the first to the last observed stage. If observed Zadoks stage for one date was larger than the observed Zadoks stage for the next measurement date, both stages were replaced by the average of the two Zadoks stages before interpolation. The interpolated values were provided in order to avoid different

192 modeling groups using different methods for interpolating the data, which would have added  
193 additional uncertainty unrelated to the model performance.

194 The average standard deviation of observed Zadoks stages based on the replicates was  
195 0.93 days. The standard deviation of interpolated days after sowing to Z30, Z65, and Z90 was  
196 calculated using a bootstrap. For a day with  $r$  replicates, a sample of size  $r$  was obtained by  
197 drawing values at random with replacement, independently for each measurement date. Then  
198 the Zadoks values were interpolated as for the original data. This was done 1000 times, giving  
199 standard deviations of 1.8 days for observed days to Z30, 0.9 days for observed days to Z65,  
200 and 0.5 days for observed days to Z90, respectively.

201 Part of the data was provided to the modeling groups for calibration , and part was never  
202 revealed to participants and used for evaluation . The calibration data originated from four sites,  
203 two years, and three planting dates, so overall 24 environments. The evaluation data were from  
204 six sites, one year, and three planting dates for a total of 18 environments (Table 1). The data  
205 were divided in such a way that the calibration and evaluation data had neither sites nor years  
206 in common.

207 **Table 1**

208 **Sites and sowing dates for calibration (underlined> and evaluation (bold). Note that**  
209 **the calibration and evaluation data have neither sites nor years in common.**

| site\ year                   | 2010 | 2011 | 2012                                                        |
|------------------------------|------|------|-------------------------------------------------------------|
| Bungunya<br>(Queensland)     |      |      | <b>2012-05-10</b><br><b>2012-05-22</b><br><b>2012-06-23</b> |
| Corrigin<br>(West Australia) |      |      | <b>2012-05-02</b><br><b>2012-05-21</b>                      |

|                                   |                                                             |                                                             |                                                             |
|-----------------------------------|-------------------------------------------------------------|-------------------------------------------------------------|-------------------------------------------------------------|
|                                   |                                                             |                                                             | <b>2012-06-21</b>                                           |
| Eradu<br>(West Australia)         | <u>2010-05-14</u><br><u>2010-05-27</u><br><u>2010-06-22</u> | <u>2011-04-29</u><br><u>2011-05-24</u><br><u>2011-06-23</u> |                                                             |
| LakeBolac<br>(Victoria)           | <u>2010-05-03</u><br><u>2010-05-19</u><br><u>2010-07-08</u> | <u>2011-05-09</u><br><u>2011-06-03</u><br><u>2011-06-16</u> |                                                             |
| Minnipa<br>(South Australia)      | <u>2010-04-30</u><br><u>2010-05-31</u><br><u>2010-06-24</u> | <u>2011-05-13</u><br><u>2011-05-27</u><br><u>2011-06-24</u> |                                                             |
| Nangwee<br>(Queensland)           |                                                             |                                                             | <b>2012-05-17</b><br><b>2012-05-31</b><br><b>2012-06-23</b> |
| Spring Ridge<br>(New South Wales) | <u>2010-05-10</u><br><u>2010-06-11</u><br><u>2010-07-01</u> | <u>2011-05-09</u><br><u>2011-06-06</u><br><u>2011-06-23</u> |                                                             |
| Temora<br>(New South Wales)       |                                                             |                                                             | <b>2012-05-05</b><br><b>2012-05-23</b><br><b>2012-06-25</b> |
| Turretfield<br>(South Australia)  |                                                             |                                                             | <b>2012-05-30</b><br><b>2012-06-15</b><br><b>2012-07-05</b> |
| Walpeup<br>(Victoria)             |                                                             |                                                             | <b>2012-04-27</b><br><b>2012-06-04</b><br><b>2012-07-18</b> |

210

211

212

213           To characterize the environments, we calculated for each environment the average  
214 temperature from sowing to Z30, Z65, and Z90, the average photoperiod from Z30 to Z65 using  
215 the daylength function in the R package *insol* (Corripio, 2019.; R Core Team, 2017) and days  
216 to full vernalization using the model in van Bussel et al. (2015) with the value  $V_{sat} = 25$  days,  
217 estimated from the figure in their paper. Figure 2 shows the range of average temperature, day  
218 length, and days to vernalization for the calibration and evaluation environments as well as the  
219 range of observed calendar days to Z30, Z65, and Z90. The range of values for the evaluation  
220 data is always within the range of the calibration data, with the single exception of photoperiod.  
221 While the median and maximum day lengths were very similar for the two sets of environments,  
222 the shortest day length was 11.5 hours among calibration environments, while among the  
223 evaluation environments the shortest day length was 10.1 hours.

224

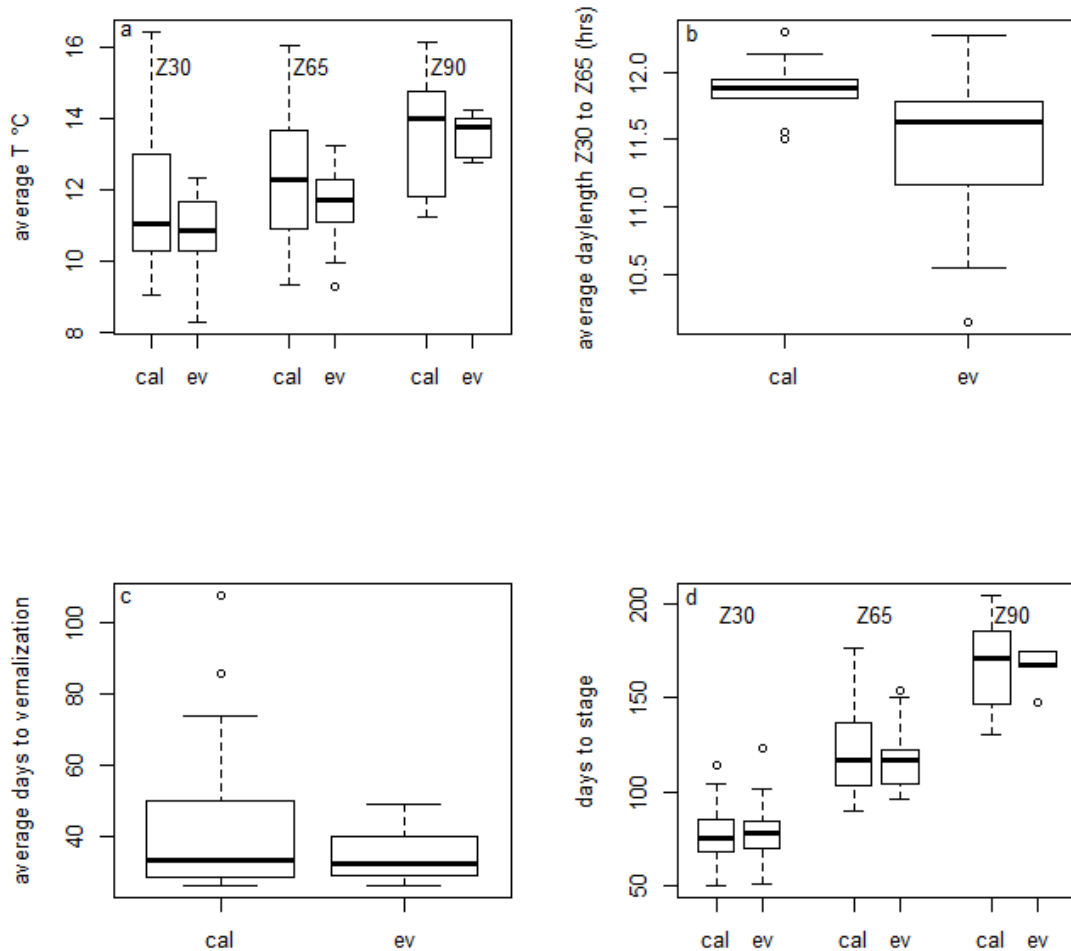

225

226

**Figure 2**

227

**Boxplots of a) average temperatures from sowing to Zadoks stages Z30, Z65, and**

228

**Z90 b) average day length between observed days of Zadoks stages Z30 and Z65 c)**

229

**average days from sowing to complete vernalization d) average days from sowing to**

230

**Zadoks stages Z30, Z65, and Z90. Results are shown separately for the calibration (ca)**

231

**and evaluation (ev) environments. Boxes indicate the lower and upper quartiles. The solid**

232

**line within the box is the median. Whiskers indicate the most extreme data point which is**

233

**no more than 1.5 times the interquartile range from the box, and the outlier dots are those**

234

**observations that are beyond that range.**

## 235 2.2 Modeling groups

236 Twenty-eight different modeling groups participated in this study. “Modeling group”  
237 here refers to the association of some specific model structure (some specific named model)  
238 with some specific parameter values. Three modeling groups used the same underlying model  
239 structure, referred to as structure S1, three groups used a second model structure (noted S2),  
240 and two groups used a third model structure (noted S3). All other groups used unique model  
241 structures. The model structures involved are presented in Supplementary Table S1. Models  
242 were considered to have the same structure even if the version number was different, because  
243 version differences are expected to be negligible for phenology. Since different groups using  
244 the same structure obtained different results, identifying the contributions by the name of the  
245 model would be misleading. Furthermore, the performance of specific groups was not of major  
246 interest here. Therefore the modeling groups were anonymized, and only identified by a  
247 number. There is no model M5 because that group dropped out in the course of the study.

248 The multi-model ensemble here was an “ensemble of opportunity” meaning that any  
249 modeling group that asked to join was accepted. The activity was announced on the list server  
250 of the Agricultural Modeling Inter-comparison and Improvement Project (AgMIP) and on the  
251 list servers of several models. In addition to the original models, we defined two ensemble  
252 models. The model e-mean has predictions equal to the mean of the simulated values. The  
253 model e-median has predictions equal to the median of the simulated values.

## 254 2.3 Simulation experiment

255 Each participating modeling group was provided with weather, soil, and management  
256 data for all environments, as well as all available observed and interpolated values for days to  
257 each Zadoks stage for the calibration data. Participants were requested to return simulated  
258 values for number of days from sowing to emergence (even though days to emergence was

259 never observed) and values for number of days from sowing to stages Z30, Z65, and Z90 for  
260 all environments, including both the calibration environments and the evaluation environments.

## 261 2.4 Evaluation

262 As our basic metric of model error, we use the mean absolute error (MAE). For a model  
263  $m$ , MAE is

$$264 \quad MAE_m = (1/n) \sum_{i=1}^n |y_i - \hat{y}_{i,m}| \quad (1)$$

265 where  $y_i$  is the observed value for environment  $i$  and  $\hat{y}_{i,m}$  is the value simulated by modeling  
266 group  $m$  for that environment. The sum is over either calibration environments, to evaluate  
267 goodness-of-fit, or over evaluation environments, to estimate prediction error. This is  
268 preferred over mean squared error (MSE) or root mean squared error (RMSE), because unlike  
269 MSE, MAE does not give extra weight to large errors (Willmott and Matsuura, 2005). To test  
270 whether MAE is the same for prediction of days to different stages, we used the R function  
271 `pairwise.t.test`, with `method="holm"` to correct for multiple comparisons. We also calculated  
272 MSE, RMSE, and NRMSE (normalized root mean squared error) for comparison with other  
273 studies.

$$274 \quad \begin{aligned} MSE_m &= (1/n) \sum_{i=1}^n (y_i - \hat{y}_{i,m})^2 \\ RMSE_m &= \sqrt{MSE_m} \\ NRMSE_m &= RMSE_m / \bar{y} \end{aligned} \quad (2)$$

275 where  $\bar{y}$  is the average of the observed values.

276 We considered two skill measures. A skill measure compares prediction error of the  
277 modeling group to be evaluated with the error of a simple model used for comparison. We  
278 define two simple models, and therefore two skill measures. Both use MSE, rather than MAE,

279 as the measure of model error, in keeping with usual practice. The first simple model, noted  
280 “naive”, predicts that days to each stage will be equal to the average number of days to that  
281 stage in the calibration data. The predictions of the naïve model here are 77.1, 123.1, and 166.5  
282 days from sowing to stages Z30, Z65, and Z90, respectively. The first skill measure, modeling  
283 efficiency (EF), is defined as

$$284 \quad EF_m = 1 - MSE_m / MSE_{naive} \quad (3)$$

285 The naive model ignores all variability and predicts that days to any stage will be the same  
286 regardless of the environment. A model with  $EF \leq 0$  is a model that does no better than the  
287 naive model, and so would be considered a very poor predictor. A perfect model, with no error,  
288 has modeling efficiency of 1. Often modeling efficiency is based on the fit of a calibrated model  
289 to the data used for calibration (McCuen et al., 2006). Here, in contrast, the naïve model is  
290 based on calibration data and used to predict for independent data.

291 The naïve model is a very low baseline for evaluating a crop model. We therefore  
292 introduce a more realistic, but still simple model which takes into account the effect of  
293 temperature on phenology. This “onlyT” model predicts that degree days ( $^{\circ}\text{D}$ ) from sowing to  
294 each stage will be equal to the number of degree days from sowing to that stage in the calibration  
295 data, where degree days on any calendar day is equal to average temperature that day. The  
296 predictions of the onlyT model are that Z30 will occur 893.7  $^{\circ}\text{D}$  after sowing, Z65 will occur  
297 1476.0  $^{\circ}\text{D}$  after sowing, and Z90 will occur 2245.7  $^{\circ}\text{D}$  after sowing. The second skill measure,  
298 noted skillT, is then

$$299 \quad skillT_m = 1 - MSE_m / MSE_{onlyT} \quad (4)$$

300 where  $MSE_{onlyT}$  is MSE for the onlyT model. As for any skill measure, a perfect model has  
301  $skillT = 1$  and a model that does no better than the onlyT model has  $skillT \leq 0$



## 302 2.5 Within- and between-model structure variability

303 Three of the model structures are used by more than one modeling group. This makes it  
304 possible to estimate separately the variance in simulated values due to structure and the variance  
305 due to modeling group nested within structure. We treat the simulated values as a sample from  
306 the distribution of plausible model structures and plausible parameter values. According to the  
307 law of total variance (Casella and Berger, 1990), the total variance of simulated values can be  
308 decomposed into two parts as

$$309 \quad \text{var}(\hat{y}) = \text{var}[E(\hat{y} | S)] + E[\text{var}(\hat{y} | S)] \quad (5)$$

310 where  $\hat{y}$  are the simulated values,  $S$  is model structure,  $E$  is the expectation,  $\text{var}$  is the variance,  
311 and the notation  $|S$  means that the expectation (in the first term on the right hand side) or the  
312 variance (in the second term on the right hand side) is taken separately for each value of model  
313 structure. We estimated the first term by first calculating the average simulated value for each  
314 structure (if a structure is represented by a single modeling group, this is just the value simulated  
315 by that group), and then calculating the variance of those average values. This is the between-  
316 structure variability. To estimate the second term, we first calculated the variance between  
317 simulated values for each of the three structures with multiple groups. Then we calculated the  
318 average of those variances. This is the within-structure variability (i.e. variability due to  
319 parameters).

## 320 3.Results

### 321 3.1 Prediction error and skill

322 MAE values for the evaluation data are shown in Figure 3 and summarized in Table 2.  
323 Results for individual modeling groups are given in Supplementary Table S2. Median MAE  
324 values (and ranges) were 12 days (8-25 days) for days to Z30, 10 days (5-24 days) for days to

325 Z65, and 7 days (1-22 days) for days to Z90. The difference between MAE for prediction of  
 326 days to Z30 and MAE for prediction of days to Z65 was significant ( $p=0.041$ ) as was the  
 327 difference between MAE for prediction of days to Z30 and MAE for prediction of days to Z90  
 328 ( $p=0.011$ ). On the other hand, the difference between MAE for prediction of days to Z65 and  
 329 to Z90 had a p value of 0.11. The median (and range) of MAE averaged over the three stages  
 330 was 9 days (6-20 days). The ensemble predictors e-mean and e-median both had averaged MAE  
 331 values of 7 days. They were both only marginally worse than the best two individual modeling  
 332 groups, and e-median was marginally better than e-mean. For comparison with other studies,  
 333 we also report other criteria of error in Table 2.

334 **Table 2**  
 335 **Summary of prediction errors for the evaluation and calibration environments,**  
 336 **in each case averaged over predictions of days to stages Z30, Z65, and Z90 except for**  
 337 **NRMSE, where the values refer to predictions of number of days to stage Z65. The**  
 338 **median, minimum, and maximum error over modeling groups are shown.**

|                  |             | median | minimum | maximum |
|------------------|-------------|--------|---------|---------|
| Evaluation data  | MAE (days)  | 9      | 6       | 20      |
|                  | RMSE (days) | 12     | 9       | 25      |
|                  | NRMSE       | 0.094  | 0.056   | 0.227   |
|                  | EF          | 0.51   | -1.51   | 0.70    |
|                  | skillT      | 0.2    | -3.34   | 0.49    |
| Calibration data | MAE (days)  | 8      | 6       | 19      |
|                  | RMSE (days) | 11     | 6       | 24      |
|                  | NRMSE       | 0.068  | 0.041   | 0.197   |

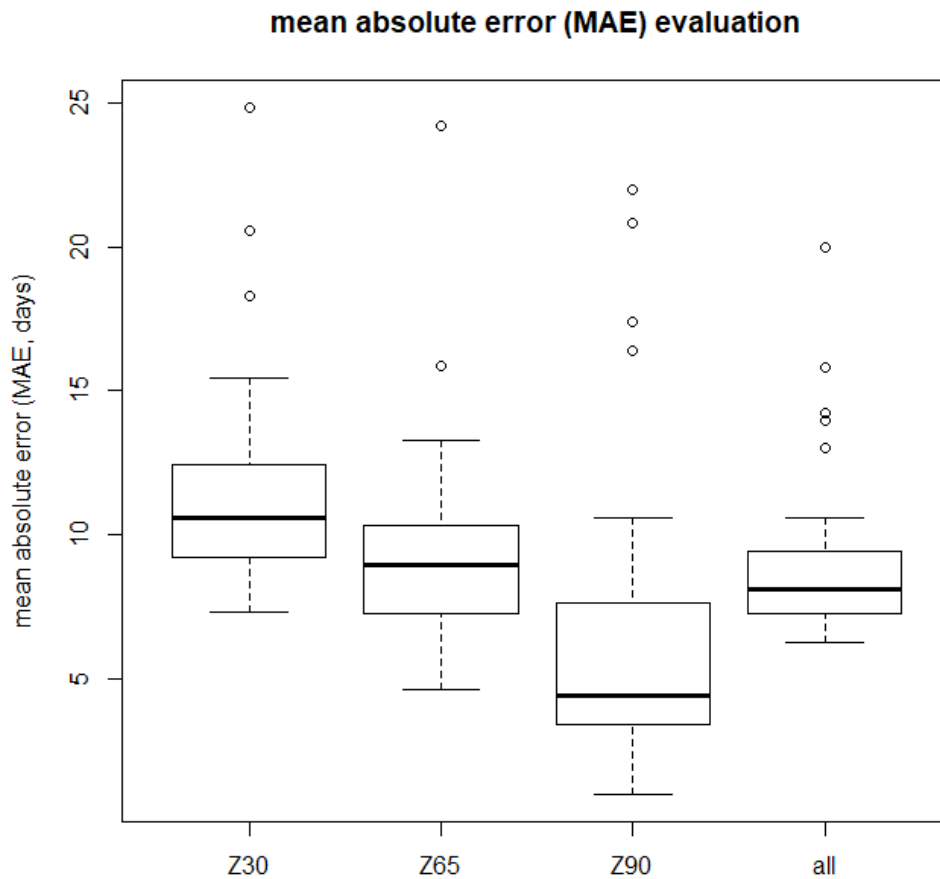

339

340

**Figure 3**

341 **Boxplot of mean absolute error (days) for each development stage and averaged**

342 **over stages, for the evaluation data. The variability is between different modeling groups.**

343 **Boxes indicate the lower and upper quartiles. The solid line within the box is the median.**

344 **Whiskers indicate the most extreme data point which is no more than 1.5 times the**

345 **interquartile range from the box, and the outlier dots are those observations that are**

346 **beyond that range.**

347

348

349 Boxplots of EF and skillT for the evaluation data are shown in Figure 4. The median  
350 EF value of the individual modeling groups, averaged over stages, was 0.51, and 86 % of the  
351 modeling groups had  $EF > 0$ . The median skillT value of the individual modeling groups,  
352 averaged over stages, was 0.20, and 68% of the modeling groups had  $skillT > 0$ .

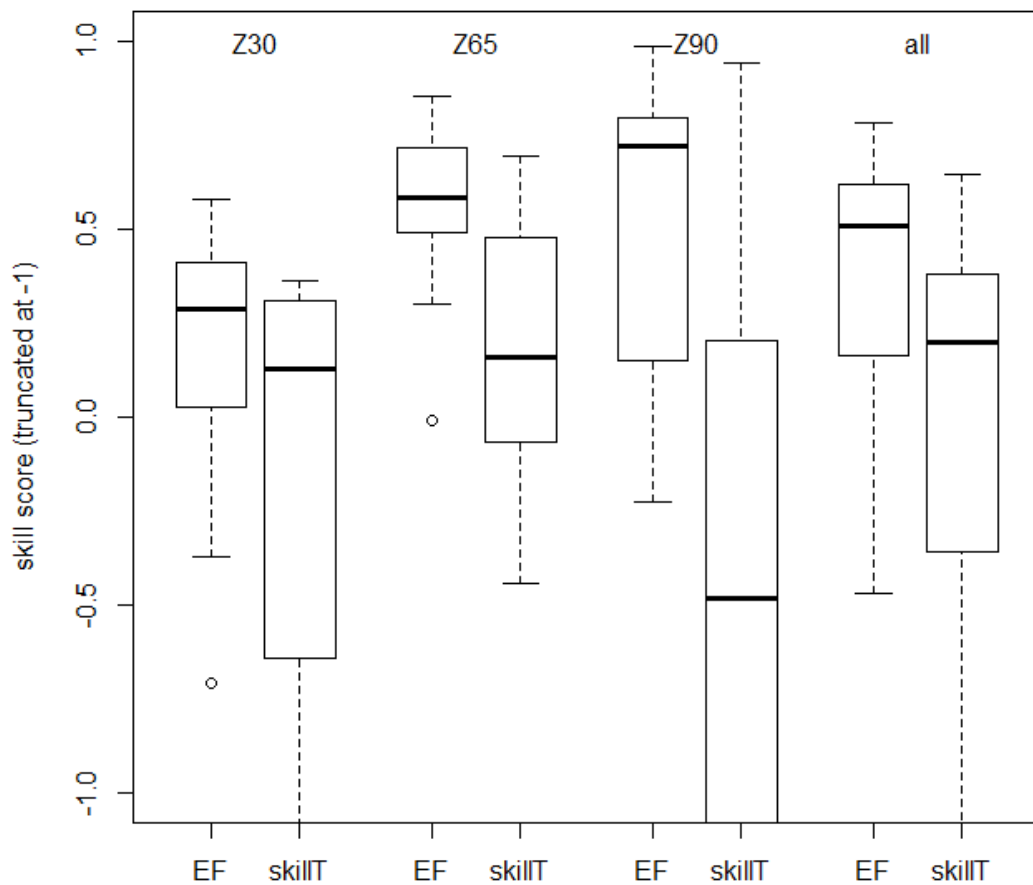

353

354

**Figure 4**

355 **Boxplots of skill scores for prediction of days to Zadoks stages Z30, Z65, and Z90,**  
356 **and averaged over stages (all) for the evaluation data. Skill score is 1 for a modeling group**  
357 **that predicts perfectly, and is less than or equal to 0 for a modeling group that does no**  
358 **better than using average days to each stage in the calibration data (EF skill score) or than**

359 **using the average number of degree days to each stage in the calibration data (skillT skill**  
360 **score). Boxes indicate the lower and upper quartiles. The solid line within the box is the**  
361 **median. Whiskers indicate the most extreme data point which is no more than 1.5 times**  
362 **the interquartile range from the box, and the outlier dots are those observations that are**  
363 **beyond that range. For readability the y axis is cut off at -1.**

364

365         The relation between overall MAE for the evaluation data and the calibration data for  
366 the same modeling group is shown in Figure 5. The calibration value explains 46 % of the  
367 variability in the evaluation data ( $R^2 = 0.46$ ) and the slope of the linear regression was  
368 significantly different than 0 at the 1% level ( $p < 0.01$ ).

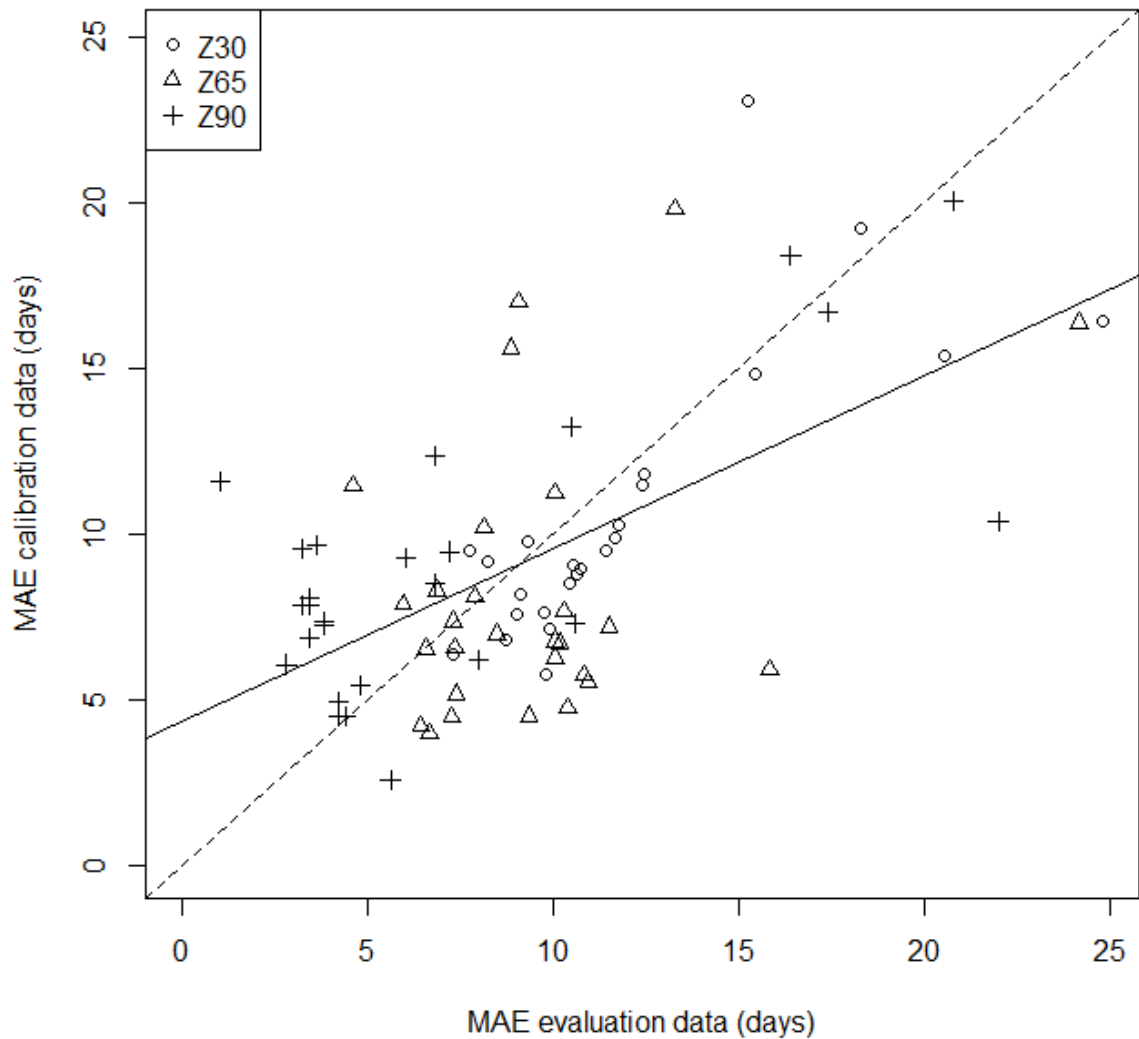

369

370

**Figure 5**

371

**Relation between MAE for the evaluation data and MAE for the calibration data.**

372

**Each point represents one Zadoks stage (Z30, Z65 or Z90) and one modeling group. The**

373

**equation of the regression line (solid line) is  $y=4.3+0.52x$  and the slope is significantly**

374

**different than 0 ( $p<0.01$ ). The dashed line is the 1:1 line.**

375

## 376 3.2 Within- and between-model structure variability

377       There was substantial variability between modeling groups for each individual  
378 prediction, including between modeling groups that share the same model structure  
379 (Supplementary Figure S1). Averaged over the evaluation environments and over all three  
380 stages Z30, Z65, and Z90, the estimated within-structure standard deviation was 4.3 days and  
381 the estimated between-structure standard deviation was 11.9 days, so the within-structure  
382 standard deviation was 36 % as large as the between-structure standard deviation.

383

## 384 4. Discussion

### 385 4.1 Comparison of calibration and evaluation environments

386       The calibration and evaluation environments were drawn from the same target  
387 population, namely wheat crops in the major wheat growing regions in Australia, with current  
388 climate and local management practices. We compared the calibration and evaluation  
389 environments for the main characteristics that are likely to affect phenology, namely  
390 temperature, day length, and accumulation of vernalizing temperatures. Temperatures and  
391 vernalizing durations of the evaluation environments were within the ranges of the calibration  
392 environments, but the evaluation data had a larger range of day lengths than the calibration data.  
393 This is the result of sampling variability, and may have led to larger prediction errors than if  
394 the calibration data had a range of day lengths comparable to that of the evaluation data.  
395 However, the range of days to each phenology stage for the evaluation data was always within  
396 the range for the calibration data. We conclude that this study represents a case where the  
397 calibration and evaluation data represent a similar range of conditions (with the caveat just  
398 mentioned concerning photoperiod). This type of situation is of particular importance, for

399 example, where one wants to calibrate a crop model using current conditions and subsequently  
400 test possible sowing dates within a limited range, or to compare phenology of multiple potential  
401 cultivars at specific sites within the calibration domain.

## 402 4.2 Prediction error

403 The evaluation here was based on data which had neither sites nor years in common  
404 with the calibration data. This was thus a rigorous estimate of how well crop modeling groups  
405 can predict wheat phenology for unseen sites and weather, when provided with calibration data  
406 sampled from the target population. The median MAE among models averaged over phenology  
407 stages was 9 days, which was substantially larger than the standard deviation of observed stages,  
408 which was in the range 1-2 days. The best modeling group had an average MAE of 7 days,  
409 which was still substantially larger than the measurement error. MAE values were significantly  
410 larger for prediction of days to Z30 than for prediction of days to later Zadoks stages. This may  
411 be due to the large variability between groups in predicting time to emergence, which is  
412 discussed in more detail below. Time to emergence is a major part of the time to Z30, but a  
413 smaller fraction of time to Z65 or Z90.

414 Chauhan et al. (2019) reported a value of NRMSE of 0.062 for prediction of time to  
415 flowering of wheat in Australia, for a version of APSIM taking the effect of water stress on  
416 phenology into account. In that study, the model was adjusted to some extent to the data used  
417 for evaluation, so the reported error probably underestimates the error for new environments.  
418 That reported value was in any case within the range of NRMSE values found for different  
419 modeling groups here, for both the evaluation data (NRMSE here from 0.056 to 0.227) and the  
420 calibration data (NRMSE here from 0.041 to 0.197). Asseng et al. (2008), using the APSIM  
421 model, found RMSE of 4 days for wheat phenology predictions (mostly predictions of days to  
422 anthesis) for 44 different environments in Western Australia, a level of error which was smaller  
423 than the minimum RMSE of 9 days found here for the evaluation data, and even smaller than



424 the minimum RMSE of 6 days found here for the calibration data. In that study, the phenology  
425 model was again adjusted to some extent to the data (S. Asseng, 2020, pers. comm.), which  
426 could explain the smaller errors.

427 The above comparisons suggest that prediction errors are very roughly similar between  
428 studies, but that there are differences depending on the details of the prediction problem and  
429 the way prediction error is evaluated. It is clearly useful to build up a knowledge base  
430 concerning phenology prediction error, as a baseline for comparison for future studies or even  
431 as a default value if evaluation is not done. Contributions to the knowledge base will be all the  
432 more useful, to the extent that the details of the prediction problem are clearly specified  
433 (including whether it is of type interpolation or extrapolation and including a characterization  
434 of the target population) and to the extent that the evaluation has a rigorous separation between  
435 the predictor and the evaluation data. The present study should therefore be a valuable  
436 contribution to such a knowledge base.

437 It is of interest to compare the results here with those from a study structured like the  
438 present study (calibration and evaluation environments with similar characteristics, evaluation  
439 data not used for model development or tuning), but where the evaluation concerned prediction  
440 of wheat phenology in France (Wallach et al., 2019). To a large extent, the same modeling  
441 groups participated in both studies. Specifically, the French study included 27 different  
442 modeling groups, 26 of which participated in the present study. A comparison between the two  
443 studies for those 26 groups is an indication of the variability of prediction errors between target  
444 populations for the same modeling groups.

445 MAE averaged over the evaluation environments and over predicted stages ranged from  
446 3 to 13 days (median 6 days) for the French data compared to 6 to 20 days (median 9 days) for  
447 the Australian data. The target population (wheat fields in Australia versus wheat fields in  
448 France) thus had a substantial effect on prediction errors. A detailed analysis of the underlying

449 reasons for the larger errors in Australia is beyond the scope of this study. However, one  
450 possible contributing cause is the simulation of time to emergence. The average simulated time  
451 to emergence for all French environments was 10 days after sowing, and the mean standard  
452 deviation between modeling groups was 4 days. The corresponding values for the Australian  
453 environments were a mean emergence time of 15 days after sowing, and a mean standard  
454 deviation between modeling groups of 18 days. This very large standard deviation for the  
455 Australian environments, pointing at major differences between modeling groups, may be due  
456 to dry conditions in some environments and the uncertainty regarding initial soil conditions,  
457 leading some models to simulate very long times to emergence (up to 107 days, Supplementary  
458 Figure S1). This suggests that for Australian environments, it would be valuable to have  
459 observations of time to emergence for calibration. It seems that for many modeling groups, it  
460 would be worthwhile to revisit the predictions of time to emergence under conditions like those  
461 of the Australian environments, taking advantage of specific modeling studies of time to  
462 emergence for wheat (Lindstrom et al., 1976; Wang et al., 2009).

463 An important question in modeling is whether the same modeling groups perform best  
464 for all target populations, or whether different groups are best for different target populations.  
465 There is quite a bit of scatter in the graph of MAE for the Australian versus French environments  
466 (Supplementary Fig. S2), but the rank correlation between the two (Kendall's tau) is 0.31, which  
467 is statistically significant ( $p=0.013$ ). This suggests that there are modeling groups which  
468 perform better than others over a wide range of environments. Once again, it is prudent to repeat  
469 that this applies to the case where calibration is based on environments that are sampled from  
470 the target distribution. Prediction errors for extrapolation to conditions very different than those  
471 of the calibration data might behave very differently.

### 472 4.3 Skill measures

473 While prediction error is of course of interest, skill scores may be even more useful, as  
474 they indicate how models compare to alternative methods of prediction. Note that the EF skill  
475 score used here is somewhat different than the usual definition. Here, the naïve model is based  
476 solely on the calibration data, so this is in fact a feasible predictor. The more usual definition  
477 of the naïve model is the mean of all the data, including the data used for evaluation. Overall,  
478 all except four modeling groups had smaller MSE (were better predictors) than the naïve model.

479 The EF criterion is a rather low baseline for evaluating the usefulness of crop models  
480 for predicting phenology. Our second skill measure compares model MSE and MSE of the  
481 onlyT model, which assumes a constant number of degree days from sowing to each Zadoks  
482 stage, and estimates that number based on the calibration data. This should be a better predictor  
483 than the naïve model if photoperiod and vernalization effects are limited, and so is a more  
484 stringent test of usefulness of process models. We found that the onlyT model was indeed a  
485 better predictor than the naïve model. Nonetheless, 19 of the modeling groups performed better  
486 than the onlyT model. It seems that in most cases here, the added complexity in crop models  
487 beyond a simple sum of degree days is warranted. More generally, we suggest that  
488 systematically calculating a skill measure like skillT would give valuable information about the  
489 usefulness of more complex models.

### 490 4.4 Model averaging

491 As found in many studies, e-median and e-mean had prediction errors comparable to  
492 the best modeling groups. This confirmed previous evidence and theoretical considerations  
493 showing that the use of e-mean or e-median is often a good strategy (Bassu et al., 2014; Palosuo  
494 et al., 2011; Rötter et al., 2012; Wallach et al., 2018). The e-mean model is based on a simple  
495 average over simulated values, so the results from every modeling group are weighted equally.

496 An open question in using model ensembles is whether it would be better to give more weight  
497 to models that have smaller prediction errors for the calibration data (Christensen et al., 2010),  
498 for example using Bayesian Model Averaging (Wöhling et al., 2015). The results here show  
499 that phenology predictive performance for the calibration environments is significantly  
500 correlated with predictive performance for new environments. This was also found to be the  
501 case for a study evaluating phenology prediction by modeling groups based on phenology in  
502 French environments (Wallach et al., 2019) and suggests that in these cases, it may be  
503 worthwhile to use performance-weighted model ensembles. This may be due to the fact that in  
504 these studies, the calibration and evaluation environments were similar to one another. In cases  
505 where one is extrapolating to conditions quite different than those represented by the calibration  
506 environments, performance weighting may be less useful. This once again emphasizes that it is  
507 important to define for each evaluation study whether it is an evaluation of type “interpolation”  
508 or “extrapolation”.

#### 509 **4.5 Structure uncertainty and parameter uncertainty**

510       Uncertainty in simulated values can arise from uncertainty in structure, from uncertainty  
511 in parameter values and from uncertainty in the values of explanatory variables (Luo and  
512 Schuur, 2019; Wallach et al., 2016). Here we focus on structure and parameter uncertainty. An  
513 important question is the relative importance of the two, to determine priorities for reducing  
514 overall uncertainty. Parameter uncertainty can arise from uncertainty in the default values of  
515 those parameters that are fixed, from uncertainty in the choice of calibration approach (for  
516 example, the form of the objective function or the choice of parameters to estimate) and from  
517 the values of the estimated parameters, which are uncertain because there is always a limited  
518 amount of data. The within-structure variability here is a measure of the uncertainty due to  
519 choice of default values and calibration approach, but not of uncertainty in the values of the  
520 calibrated parameters. The within-structure standard deviation here is 4.3 days, compared to a

521 between-structure standard deviation (contribution of structure) of 11.9 days. The study based  
522 on French environments found a within-structure standard deviation of 5.6 days and a between-  
523 structure standard deviation of 8.0 days (Wallach et al., 2019). Confalonieri et al. (2016) also  
524 found that the within-structure effect was in general, but not in all cases, smaller than the  
525 between-structure effect on variability.

526 Other studies have on the contrary focused on structural uncertainty versus uncertainty  
527 in the calibrated parameters, without taking into account uncertainty in all the default parameter  
528 values, nor uncertainty in the calibration approach chosen. Zhang et al. (2017) found that model  
529 structure explained about 80 % of the variability in simulated time to heading in rice and about  
530 92 % of the variability in simulated time to maturity in rice, the remainder of the variability  
531 being due to parameter uncertainty. Wallach et al. (2017) found that model structure uncertainty  
532 contributed about twice as much variance as parameter uncertainty to overall simulation  
533 variance. It would be of interest to have a fuller treatment of parameter uncertainty, including  
534 both different groups using the same model structure and an estimate of the uncertainty in the  
535 parameters estimated by each group.

## 536 5. Conclusions

537 We evaluated how well 28 crop modeling groups simulate wheat phenology in  
538 Australia, in the case where both the calibration data and the evaluation data were sampled from  
539 fields in the major wheat growing areas in Australia under current climate and local  
540 management. It is important to distinguish between interpolation type prediction, as here, and  
541 extrapolation type, since they are not evaluating the same properties of modeling groups. It is  
542 also important to emphasize that evaluation concerns both model structure and parameter  
543 values, and therefore the modeling group and not just the underlying model structure. MAE for  
544 the evaluation data here ranged from six to 20 days depending on the modeling group, with a

545 median of 9 days. About two thirds of the modeling groups performed better than a simple but  
546 relevant benchmark, which predicts phenology assuming a constant temperature sum for each  
547 development stage. The added complexity of crop models beyond just the effect of temperature  
548 is therefore justified in most cases. As found in many other studies, the multi-modeling group  
549 mean and median had prediction errors nearly as small as the best modeling group, suggesting  
550 that using these ensemble predictors is a good strategy. Prediction errors for calibration and  
551 evaluation environments were found to be significantly correlated, which suggests that for  
552 interpolation type studies, it would be of interest to test ensemble predictors that weight  
553 individual models based on performance for the calibration data. The variability due to  
554 modeling group for a given model structure, which reflects part of parameter uncertainty, was  
555 found to be smaller than the variability due to model structure, but was not negligible. This  
556 implies that model improvement could be achieved not only by improving model structure but  
557 also by improving parameter values.

558

## 559 **Acknowledgements**

560 This work was in part supported by the Collaborative Research Center 1253 CAMPOS  
561 (Project 7: Stochastic Modelling Framework), funded by the German Research Foundation  
562 (DFG, Grant Agreement SFB 1253/1 2017), the Academy of Finland through projects AI-  
563 CropPro (316172 and 315896) and DivCSA (316215) and Natural Resources Institute Finland  
564 (Luke) through a strategic project BoostIA, the BonaRes projects "Soil3" (BOMA 03037514)  
565 and "I4S" (031B0513I) of the Federal Ministry of Education and Research (BMBF), Germany,  
566 the Deutsche Forschungsgemeinschaft (DFG, German Research Foundation) under Germany's  
567 Excellence Strategy - EXC 2070 – 390732324, the project BiomassWeb of the GlobeE  
568 programme (Grant number: FKZ031A258B) funded by the Federal Ministry of Education and

569 Research (BMBF, Germany), the EU funded SustEs project  
570 (CZ.02.1.01/0.0/0.0/16\_019/0000797), the INRA ACCAF meta-programme, the German  
571 Federal Ministry of Education and Research (BMBF) in the framework of the funding measure  
572 “Soil as a Sustainable Resource for the Bioeconomy – BonaRes”, project “BonaRes (Module  
573 B): BonaRes Centre for Soil Research, subproject B” (grant 031B0511B), the National Key  
574 Research and Development Program of China (2017YFD0300205), the National Science  
575 Foundation for Distinguished Young Scholars (31725020), the Priority Academic Program  
576 Development of Jiangsu Higher Education Institutions (PAPD), the 111 project (B16026), and  
577 China Scholarship Council, the Agriculture and Agri-Food Canada's Project 1387 under the  
578 Canadian Agricultural Partnership, the DFG Research Unit FOR 1695 ‘Agricultural  
579 Landscapes under Global Climate Change – Processes and Feedbacks on a Regional Scale, the  
580 U.S. Department of Agriculture National Institute of Food and Agriculture (award no. 2015-  
581 68007-23133) and USDA/NIFA HATCH grant N. MCL02368, the National Key Research and  
582 Development Program of China (2016YFD0300105), The Broadacre Agriculture Initiative, a  
583 research partnership between University of Southern Queensland and the Queensland  
584 Department of Agriculture and Fisheries, the Academy of Finland through project AI-CropPro  
585 (315896), the JPI FACCE MACSUR2 project, funded by the Italian Ministry for Agricultural,  
586 Food, and Forestry Policies (D.M. 24064/7303/15 of 26/Nov/2015). The field work was jointly  
587 funded by CSIRO and the Grains Research and Development Corporation (GRDC) under the  
588 "Adding Value to GRDC’s National Variety Trial Network" project (CSA00027). The order in  
589 which the donors are listed is arbitrary

590

## 591 References

- 592 Andarzian, Bahram, Hoogenboom, G., Bannayan, M., Shirali, M., Andarzian, Behnam, 2015.  
593 Determining optimum sowing date of wheat using CSM-CERES-Wheat model. *J. Saudi*  
594 *Soc. Agric. Sci.* 14, 189–199. <https://doi.org/10.1016/J.JSSAS.2014.04.004>
- 595 Archontoulis, S. V., Miguez, F.E., Moore, K.J., 2014. A methodology and an optimization  
596 tool to calibrate phenology of short-day species included in the APSIM PLANT model:  
597 Application to soybean. *Environ. Model. Softw.* 62, 465–477.  
598 <https://doi.org/10.1016/j.envsoft.2014.04.009>
- 599 Asseng, S., Keating, B.A., Fillery, I.R.P., Gregory, P.J., Bowden, J.W., Turner, N.C., Palta,  
600 J.A., Abrecht, D.G., 2008. Performance of the APSIM-wheat model in Western  
601 Australia. *F. Crop. Res.* 57, 163–179.
- 602 Bao, Y., Hoogenboom, G., McClendon, R., Vellidis, G., 2017. A comparison of the  
603 performance of the CSM-CERES-Maize and EPIC models using maize variety trial data.  
604 *Agric. Syst.* 150, 109–119. <https://doi.org/10.1016/J.AGSY.2016.10.006>
- 605 Bassu, S., Brisson, N., Durand, J.-L., Boote, K., Lizaso, J., Jones, J.W., Rosenzweig, C.,  
606 Ruane, A.C., Adam, M., Baron, C., Basso, B., Biernath, C., Boogaard, H., Conijn, S.,  
607 Corbeels, M., Deryng, D., De Sanctis, G., Gayler, S., Grassini, P., Hatfield, J., Hoek, S.,  
608 Izaurralde, C., Jongschaap, R., Kemanian, A.R., Kersebaum, K.C., Kim, S.-H., Kumar,  
609 N.S., Makowski, D., Müller, C., Nendel, C., Priesack, E., Pravia, M.V., Sau, F.,  
610 Shcherbak, I., Tao, F., Teixeira, E., Timlin, D., Waha, K., 2014. How do various maize  
611 crop models vary in their responses to climate change factors? *Glob. Chang. Biol.* 20,  
612 2301–20. <https://doi.org/10.1111/gcb.12520>
- 613 Biernath, C., Gayler, S., Bittner, S., Klein, C., Högy, P., Fangmeier, A., Priesack, E., 2011.  
614 Evaluating the ability of four crop models to predict different environmental impacts on



- 615           spring wheat grown in open-top chambers. *Eur. J. Agron.* 35, 71–82.
- 616           <https://doi.org/10.1016/j.eja.2011.04.001>
- 617   Boote, K.J., Jones, J.W., Hoogenboom, G., 2008. Crop simulation models as tools for agro-  
618           advisories for weather and disease effects on production. *J. Agrometeorol.* 10, 9–17.
- 619   Boote, K.J., Jones, J.W., Hoogenboom, G., White, J.W., 2010. The Role of Crop Systems  
620           Simulation in Agriculture and Environment. *Int. J. Agric. Environ. Inf. Syst.* 1, 41–54.
- 621   Casella, G., Berger, R.L., 1990. *Statistical Inference*. Wadsworth and Brooks, Pacific Grove,  
622           CA.
- 623   Ceglar, A., van der Wijngaart, R., de Wit, A., Lecerf, R., Boogaard, H., Seguini, L., van den  
624           Berg, M., Toreti, A., Zampieri, M., Fumagalli, D., Baruth, B., 2019. Improving  
625           WOFOST model to simulate winter wheat phenology in Europe: Evaluation and effects  
626           on yield. *Agric. Syst.* 168, 168–180. <https://doi.org/10.1016/J.AGSY.2018.05.002>
- 627   Chauhan, Y.S., Ryan, M., Chandra, S., Sadras, V.O., 2019. Accounting for soil moisture  
628           improves prediction of flowering time in chickpea and wheat. *Sci. Rep.* 9, 7510.  
629           <https://doi.org/10.1038/s41598-019-43848-6>
- 630   Christensen, J., Kjellström, E., Giorgi, F., Lenderink, G., Rummukainen, M., 2010. Weight  
631           assignment in regional climate models. *Clim. Res.* 44, 179–194.  
632           <https://doi.org/10.3354/cr00916>
- 633   Confalonieri, R., Orlando, F., Paleari, L., Stella, T., Gilardelli, C., Movedi, E., Pagani, V.,  
634           Cappelli, G., Vertemara, A., Alberti, L., Alberti, P., Atanassiu, S., Bonaiti, M.,  
635           Cappelletti, G., Ceruti, M., Confalonieri, A., Corgatelli, G., Corti, P., Dell’Oro, M.,  
636           Ghidoni, A., Lamarta, A., Maghini, A., Mambretti, M., Manchia, A., Massoni, G., Mutti,  
637           P., Pariani, S., Pasini, D., Pesenti, A., Pizzamiglio, G., Ravasio, A., Rea, A., Santorsola,

- 638 D., Serafini, G., Slavazza, M., Acutis, M., 2016. Uncertainty in crop model predictions:  
639 What is the role of users? *Environ. Model. Softw.* 81, 165–173.  
640 <https://doi.org/10.1016/j.envsoft.2016.04.009>
- 641 Corripio, J.G., n.d. *insol: Solar Radiation*. R package version 1.2. 2019.
- 642 Efron, B., 1986. How Biased is the Apparent Error Rate of a Prediction Rule? *J. Am. Stat.*  
643 *Assoc.* 81, 461–470. <https://doi.org/10.1080/01621459.1986.10478291>
- 644 Flohr, B.M., Hunt, J.R., Kirkegaard, J.A., Evans, J.R., 2017. Water and temperature stress  
645 define the optimal flowering period for wheat in south-eastern Australia. *F. Crop. Res.* v.  
646 209, 108–119. <https://doi.org/10.1016/j.fcr.2017.04.012>
- 647 Hussain, J., Khaliq, T., Ahmad, A., Akhtar, J., 2018. Performance of four crop model for  
648 simulations of wheat phenology, leaf growth, biomass and yield across planting dates.  
649 *PLoS One* 13, e0197546. <https://doi.org/10.1371/journal.pone.0197546>
- 650 Lawes, R.A., Huth, N.D., Hochman, Z., 2016. Commercially available wheat cultivars are  
651 broadly adapted to location and time of sowing in Australia’s grain zone. *Eur. J. Agron.*  
652 77, 38–46. <https://doi.org/10.1016/J.EJA.2016.03.009>
- 653 Lindstrom, M.J., Papendick, R.I., Koehler, F.E., 1976. A Model to Predict Winter Wheat  
654 Emergence as Affected by Soil Temperature, Water Potential, and Depth of Planting1.  
655 *Agron. J.* 68, 137–141. <https://doi.org/10.2134/agronj1976.00021962006800010038x>
- 656 Luo, Q., O’Leary, G., Cleverly, J., Eamus, D., 2018. Effectiveness of time of sowing and  
657 cultivar choice for managing climate change: wheat crop phenology and water use  
658 efficiency. *Int. J. Biometeorol.* 62, 1049–1061. <https://doi.org/10.1007/s00484-018->  
659 1508-4
- 660 Luo, Y., Schuur, E.A.G., 2019. Model Parameterization to Represent Processes at Unresolved

- 661 Scales and Changing Properties of evolving Systems. *Glob. Chang. Biol.* gcb.14939.  
662 <https://doi.org/10.1111/gcb.14939>
- 663 McCuen, R.H., Knight, Z., Cutter, A.G., 2006. Evaluation of the Nash–Sutcliffe Efficiency  
664 Index. *J. Hydrol. Eng.* 11, 597–602. [https://doi.org/10.1061/\(ASCE\)1084-  
665 0699\(2006\)11:6\(597\)](https://doi.org/10.1061/(ASCE)1084-0699(2006)11:6(597))
- 666 Palosuo, T., Kersebaum, K.C., Angulo, C., Hlavinka, P., Moriondo, M., Olesen, J.E., Patil,  
667 R.H., Ruget, F., Rumbaur, C., Takáč, J., Trnka, M., Bindi, M., Çaldağ, B., Ewert, F.,  
668 Ferrise, R., Mirschel, W., Şaylan, L., Šiška, B., Rötter, R., 2011. Simulation of winter  
669 wheat yield and its variability in different climates of Europe: A comparison of eight  
670 crop growth models. *Eur. J. Agron.* 35, 103–114.  
671 <https://doi.org/10.1016/j.eja.2011.05.001>
- 672 R Core Team, 2017. A language and Environment for Statistical Computing.
- 673 Rötter, R.P., Palosuo, T., Kersebaum, K.C., Angulo, C., Bindi, M., Ewert, F., Ferrise, R.,  
674 Hlavinka, P., Moriondo, M., Nendel, C., Olesen, J.E., Patil, R.H., Ruget, F., Takáč, J.,  
675 Trnka, M., 2012. Simulation of spring barley yield in different climatic zones of  
676 Northern and Central Europe: A comparison of nine crop models. *F. Crop. Res.* 133, 23–  
677 36. <https://doi.org/10.1016/j.fcr.2012.03.016>
- 678 Sadras, V.O., Monzon, J.P., 2006. Modelled wheat phenology captures rising temperature  
679 trends: Shortened time to flowering and maturity in Australia and Argentina. *F. Crop.  
680 Res.* 99, 136–146. <https://doi.org/10.1016/J.FCR.2006.04.003>
- 681 Teluguntla, P., Thenkabail, P.S., Oliphant, A., Xiong, J., Gumma, M.K., Congalton, R.G.,  
682 Yadav, K., Huete, A., 2018. A 30-m landsat-derived cropland extent product of Australia  
683 and China using random forest machine learning algorithm on Google Earth Engine  
684 cloud computing platform. *ISPRS J. Photogramm. Remote Sens.* 144, 325–340.

- 685 <https://doi.org/10.1016/J.ISPRSJPRS.2018.07.017>
- 686 van Bussel, L.G.J., Stehfest, E., Siebert, S., Müller, C., Ewert, F., 2015. Simulation of the  
687 phenological development of wheat and maize at the global scale. *Glob. Ecol. Biogeogr.*  
688 24, 1018–1029. <https://doi.org/10.1111/geb.12351>
- 689 Wallach, D., Martre, P., Liu, B., Asseng, S., Ewert, F., Thorburn, P.J., van Ittersum, M.,  
690 Aggarwal, P.K., Ahmed, M., Basso, B., Biernath, C., Cammarano, D., Challinor, A.J.,  
691 De Sanctis, G., Dumont, B., Eyshi Rezaei, E., Fereres, E., Fitzgerald, G.J., Gao, Y.,  
692 Garcia-Vila, M., Gayler, S., Girousse, C., Hoogenboom, G., Horan, H., Izaurrealde, R.C.,  
693 Jones, C.D., Kassie, B.T., Kersebaum, K.C., Klein, C., Koehler, A.-K., Maiorano, A.,  
694 Minoli, S., Müller, C., Naresh Kumar, S., Nendel, C., O’Leary, G.J., Palosuo, T.,  
695 Priesack, E., Ripoche, D., Rötter, R.P., Semenov, M.A., Stöckle, C., Stratonovitch, P.,  
696 Streck, T., Supit, I., Tao, F., Wolf, J., Zhang, Z., 2018. Multimodel ensembles improve  
697 predictions of crop-environment-management interactions. *Glob. Chang. Biol.* 24, 5072–  
698 5083. <https://doi.org/10.1111/gcb.14411>
- 699 Wallach, D., Nissanka, S.P., Karunaratne, A.S., Weerakoon, W.M.W., Thorburn, P.J., Boote,  
700 K.J., Jones, J.W., 2017. Accounting for both parameter and model structure uncertainty  
701 in crop model predictions of phenology: A case study on rice. *Eur. J. Agron.* 88.  
702 <https://doi.org/10.1016/j.eja.2016.05.013>
- 703 Wallach, D., Palosuo, T., Thorburn, P., Seidel, S.J., Gourdain, E., Asseng, S., Basso, B., Buis,  
704 S., Crout, N.M.J., Dibari, C., Dumont, B., Ferrise, R., Gaiser, T., Garcia, C., Gayler, S.,  
705 Ghahramani, A., Hochman, Z., Hoek, S., Horan, H., Hoogenboom, G., Huang, M.,  
706 Jabloun, M., Jing, Q., Justes, E., Kersebaum, K.C., Klosterhalfen, A., Launay, M., Luo,  
707 Q., Maestrini, B., Mielenz, H., Moriondo, M., Nariman Zadeh, H., Olesen, J.E., Poyda,  
708 A., Priesack, E., Pullens, J.W.M., Qian, B., Schütze, N., Shelia, V., Souissi, A., Specka,

- 709 X., Srivastava, A.K., Stella, T., Streck, T., Trombi, G., Wallor, E., Wang, J., Weber,  
710 T.K.D., Weihermüller, L., de Wit, A., Wöhling, T., Xiao, L., Zhao, C., Zhu, Y., 2019.  
711 How well do crop models predict phenology, with emphasis on the effect of calibration?  
712 bioRxiv 708578. <https://doi.org/10.1101/708578>
- 713 Wallach, D., Thorburn, P., Asseng, S., Challinor, A.J., Ewert, F., Jones, J.W., Rotter, R.,  
714 Ruane, A., 2016. Estimating model prediction error: Should you treat predictions as  
715 fixed or random? *Environ. Model. Softw.* 84, 529–539.  
716 <https://doi.org/10.1016/j.envsoft.2016.07.010>
- 717 Wang, H., Cutforth, H., McCaig, T., McLeod, G., Brandt, K., Lemke, R., Goddard, T.,  
718 Sprout, C., 2009. Predicting the time to 50% seedling emergence in wheat using a Beta  
719 model. *NJAS - Wageningen J. Life Sci.* 57, 65–71.  
720 <https://doi.org/https://doi.org/10.1016/j.njas.2009.07.003>
- 721 Willmott, C.J., Matsuura, K., 2005. Advantages of the mean absolute error (MAE) over the  
722 root mean square error (RMSE) in assessing average model performance. *Clim. Res.* 30,  
723 79–82.
- 724 Wöhling, T., Schöniger, A., Gayler, S., Nowak, W., 2015. Bayesian model averaging to  
725 explore the worth of data for soil-plant model selection and prediction. *Water Resour.*  
726 *Res.* 51, 2825–2846. <https://doi.org/10.1002/2014WR016292>
- 727 Workman, D., 2020. Worldstopexports [WWW Document]. URL  
728 <http://www.worldstopexports.com/wheat-exports-country/> (accessed 3.10.20).
- 729 Yuan, S., Peng, S., Li, T., 2017. Evaluation and application of the ORYZA rice model under  
730 different crop managements with high-yielding rice cultivars in central China. *F. Crop.*  
731 *Res.* 212, 115–125. <https://doi.org/10.1016/J.FCR.2017.07.010>

- 732 Zadoks, J.C., Chzang, T.T., Konzak, C.F., 1974. A decimal code for the growth stages of  
733 cereals. *Weed Res.* 14, 415–421. <https://doi.org/10.1111/j.1365-3180.1974.tb01084.x>
- 734 Zhang, S., Tao, F., Zhang, Z., 2017. Uncertainty from model structure is larger than that from  
735 model parameters in simulating rice phenology in China. *Eur. J. Agron.* 87, 30–39.  
736 <https://doi.org/10.1016/j.eja.2017.04.004>
- 737
